# Supplementary material
Source: PubMed Central journal article supplement (PMC4485080)
Supplement: pnas.201503824SI.pdf [file pnas.201503824SI.pdf]

# Supporting Information

Cohen and Xu 10.1073/pnas.1503824112

## SI Text

If  $X$  is a real-valued random variable with finite mean  $E(X)$  and finite variance  $\text{var}(X)$ , and if a real-valued function  $f$  of real  $x$  is twice differentiable at  $E(X)$ , then the delta method (ref. 1 and ref. 2, pp. 355–358) gives the approximations

$$\begin{aligned} f(X) &\approx f(E(X)) + (X - E(X)) \left\{ f'(x) \Big|_{x=E(X)} \right\}, \\ E(f(X)) &\approx f(E(X)) + \left\{ \frac{f''(x)}{2} \Big|_{x=E(X)} \right\} \cdot \text{var}(X), \\ \text{var}(f(X)) &\approx \left\{ f'(x) \Big|_{x=E(X)} \right\}^2 \text{var}(X). \end{aligned}$$

In practice, we compute sample moments from observations of  $X$ , plug them in to replace the population moments, and accept the result as approximations to the left sides.

**Lemma 1.** Suppose  $Y$  is a nonnegative real-valued random variable with finite mean  $E(Y) = M > 0$  and finite variance  $\text{var}(Y) = V > 0$ . Assume sampled observations are iid and the sample size in block  $j$  is  $n_j$  ( $j = 1, 2, \dots, N$ ) and  $N$  is the number of blocks. If  $m_j$  is the sample mean of observations in block  $j$ , then the approximations given by the delta method are  $\log m_j \approx \log M + (m_j - M)/M$ ,  $E(\log m_j) \approx \log M - V/(2n_j M^2)$ ,  $\text{var}(\log m_j) \approx V/(n_j M^2)$ .

**Proof:** In the approximations from the delta method, we set  $X = m_j$ ,  $f(x) = \log(x)$ ,  $x > 0$ . Therefore,  $f'(x) = 1/x$  and  $f''(x) = -1/x^2$ . Because  $E(m_j) = M$  and  $\text{var}(m_j) = V/n_j$ ,

$$\begin{aligned} \log m_j &\approx f(M) + (m_j - M) \cdot \frac{1}{M} = \log M + (m_j - M)/M, \\ E(\log m_j) &\approx f(M) + \left( -\frac{1}{2M^2} \right) \cdot \frac{V}{n_j} = \log M - V/(2n_j M^2), \\ \text{var}(\log m_j) &\approx \left( \frac{1}{M} \right)^2 \cdot \frac{V}{n_j} = V/(n_j M^2). \end{aligned}$$

The proof is complete.

**Lemma 2.** Under the assumptions of Lemma 1 also assume the third and fourth central moments of the random variable  $Y$  are finite and positive, that is,  $\mu_h = E\{(Y - M)^h\} > 0$ ,  $h = 3, 4$ . Suppose  $v_j$  is the unbiased sample variance of observations in block  $j$  and  $E(v_j) = V > 0$ . Then the approximations given by the delta method are  $\log v_j \approx \log V + (v_j - V)/V$ ,  $\text{var}(\log v_j) \approx \left( \mu_4 - \frac{n_j - 3}{n_j - 1} V^2 \right) / (n_j V^2)$ ,  $E(\log v_j) \approx \log V - \frac{1}{2n_j} \left( \frac{\mu_4}{V^2} - \frac{n_j - 3}{n_j - 1} \right)$ .

**Proof:** Setting  $X = v_j$  and following the same arguments as in the proof of Lemma 1 give the results.

**Lemma 3.** Under the assumptions of Lemmas 1 and 2, the covariance of the sample mean and sample variance is  $\text{cov}(v_j, m_j) = \mu_3/n_j$ .

Zhang (3) gives a proof of this classical formula, which has been known at least since 1903 (ref. 4, p. 279, equation xiii; ref. 5, p. 7, equation xxvi; ref. 6, p. 479, equation 67; and ref. 7, p. 402, equations 3 and 4).

**Proof of Theorem:** When all blocks are weighted equally, the least-squares estimators of slope  $b$  and intercept  $\log(a)$ , and SE of the slope estimator  $s(\hat{b})$  are, respectively (8, p. 155),

$$\begin{aligned} \hat{b} &= \text{cov}_+(\log v_j, \log m_j) / \text{var}_+(\log m_j), \\ \widehat{\log(a)} &= \text{mean}_+(\log v_j) - \hat{b} \cdot \text{mean}_+(\log m_j), \\ s(\hat{b}) &= \sqrt{[\text{var}_+(\log v_j) / \text{var}_+(\log m_j) - \{\text{cov}_+(\log v_j, \log m_j)\}^2 / \{\text{var}_+(\log m_j)\}^2] / (N - 2)}. \end{aligned}$$

The notations  $\text{mean}_+(\cdot)$ ,  $\text{var}_+(\cdot)$ , and  $\text{cov}_+(\cdot, \cdot)$  are to be read as the mean, variance, and covariance across all blocks and not as referring to any single block  $j$ . Explicitly, the sample estimators are defined by

$$\text{mean}_+(\log m_j) = \frac{1}{N} \sum_{j=1}^N \log m_j,$$

$$mean_+(\log v_j) = \frac{1}{N} \sum_{j=1}^N \log v_j,$$

$$var_+(\log m_j) = \frac{1}{N-1} \sum_{j=1}^N (\log m_j)^2 - \frac{1}{N(N-1)} \left( \sum_{j=1}^N \log m_j \right)^2,$$

$$var_+(\log v_j) = \frac{1}{N-1} \sum_{j=1}^N (\log v_j)^2 - \frac{1}{N(N-1)} \left( \sum_{j=1}^N \log v_j \right)^2,$$

$$cov_+(\log v_j, \log m_j) = \frac{1}{N-1} \sum_{j=1}^N (\log m_j \cdot \log v_j) - \frac{1}{N(N-1)} \left( \sum_{j=1}^N \log m_j \right) \left( \sum_{j=1}^N \log v_j \right).$$

They are all consistent by the law of large numbers: as  $N \rightarrow \infty$ ,  $mean_+(\log m_j) \rightarrow_P E(\log m_j)$ ,  $mean_+(\log v_j) \rightarrow_P E(\log v_j)$ ,  $var_+(\log m_j) \rightarrow_P var(\log m_j)$ ,  $var_+(\log v_j) \rightarrow_P var(\log v_j)$ , and  $cov_+(\log v_j, \log m_j) \rightarrow_P cov(\log v_j, \log m_j)$ . Here the symbol " $\rightarrow_P$ " means convergence in probability.

To find the limits in probability of  $\hat{b}$  and  $s(\hat{b})$ , we approximate the above estimators by the delta method using *Lemmas 1, 2, and 3*. We first approximate the numerator and the denominator of  $\hat{b}$  separately. For the numerator of  $\hat{b}$ , namely,  $cov_+(\log v_j, \log m_j)$ , the first term is approximately

$$\begin{aligned} \frac{1}{N-1} \sum_{j=1}^N (\log m_j \cdot \log v_j) &\approx \frac{1}{N-1} \sum_{j=1}^N \left\{ \log M + \frac{1}{M} (m_j - M) \right\} \cdot \left\{ \log V + \frac{1}{V} (v_j - V) \right\} \\ &= \frac{N}{N-1} \cdot \log M \cdot \log V + \frac{\log V}{(N-1)M} \sum_{j=1}^N (m_j - M) + \frac{\log M}{(N-1)V} \sum_{j=1}^N (v_j - V) + \frac{1}{(N-1)MV} \sum_{j=1}^N (m_j - M)(v_j - V). \end{aligned}$$

The second term of the numerator of  $\hat{b}$  is approximately

$$\begin{aligned} \frac{1}{N(N-1)} \left( \sum_{j=1}^N \log m_j \right) \left( \sum_{j=1}^N \log v_j \right) &\approx \frac{1}{N(N-1)} \sum_{j=1}^N \left\{ \log M + \frac{1}{M} (m_j - M) \right\} \cdot \sum_{j=1}^N \left\{ \log V + \frac{1}{V} (v_j - V) \right\} \\ &= \frac{N}{N-1} \cdot \log M \cdot \log V + \frac{\log V}{(N-1)M} \sum_{j=1}^N (m_j - M) + \frac{\log M}{(N-1)V} \sum_{j=1}^N (v_j - V) \\ &\quad + \frac{1}{N(N-1)MV} \sum_{j=1}^N (m_j - M) \sum_{j=1}^N (v_j - V). \end{aligned}$$

Therefore

$$\begin{aligned} cov_+(\log v_j, \log m_j) &\approx \frac{1}{(N-1)MV} \sum_{j=1}^N (m_j - M)(v_j - V) - \frac{1}{N(N-1)MV} \sum_{j=1}^N (m_j - M) \sum_{j=1}^N (v_j - V) \\ &= \frac{1}{(N-1)MV} \sum_{j=1}^N m_j v_j - \frac{1}{N(N-1)MV} \sum_{j=1}^N m_j \sum_{j=1}^N v_j = \frac{cov_+(m_j, v_j)}{MV}. \end{aligned}$$

Similarly, the denominator of  $\hat{b}$  is approximately

$$var_+(\log m_j) \approx \frac{1}{M^2} \left\{ \frac{1}{(N-1)} \sum_{j=1}^N m_j^2 - \frac{1}{N(N-1)} \left( \sum_{j=1}^N m_j \right)^2 \right\} = var_+(m_j) / M^2.$$

Consequently, for large  $n_j$ ,  $j = 1, 2, \dots, N$ ,  $\hat{b} \approx \frac{cov_+(m_j, v_j)}{MV} / \frac{var_+(m_j)}{M^2}$ . By consistency, for large  $N$ , using *Lemma 3* in the numerator,

$$\hat{b} \approx \frac{cov(m_j, v_j)}{MV} / \frac{var(m_j)}{M^2} = \frac{\mu_3}{n_j MV} / \frac{V}{n_j M^2} = \mu_3 M / V^2 = \gamma_1 / CV.$$

Using the consistency of estimator  $mean_+(\cdot)$  and existing expressions for  $E(\log m_j)$ ,  $E(\log v_j)$  and  $\hat{b}$ , for large  $N$  and  $n_j$ ,  $j = 1, 2, \dots, N$ ,

$$\widehat{\log(a)} \approx E(\log v_j) - \hat{b} \cdot E(\log m_j) \approx \left[ \log V - \frac{1}{2n_j} \left( \frac{\mu_4}{V^2} - \frac{n_j - 3}{n_j - 1} \right) \right] - \frac{\gamma_1}{CV} [\log M - V / (2n_j M^2)] \approx \log V - \frac{\gamma_1}{CV} \cdot \log M.$$

The derivation of  $\text{var}_+(\log v_j)$  is the same as that of  $\text{var}_+(\log m_j)$ . Replacing  $m_j$  with  $v_j$  and  $M$  with  $V$  yields  $\text{var}_+(\log v_j) \approx \text{var}_+(v_j)/V^2$ . For large  $N$  and  $n_j, j=1, 2, \dots, N$ , substituting into the formula for  $s(\hat{b})$  the estimators corresponding to  $\text{var}_+(m_j), \text{var}_+(v_j)$ , and  $\hat{b}$  yields

$$s(\hat{b}) \approx \sqrt{\frac{1}{N-2} \left[ \left( \frac{\mu_4}{V^2} - 1 \right) / \frac{V}{M^2} - (\mu_3 M / V^2)^2 \right]} = \sqrt{\frac{M^2 (\mu_4 V - V^3 - \mu_3^2)}{(N-2)V^4}} = \sqrt{\frac{\kappa - 1 - \gamma_1^2}{(N-2)(CV)^2}},$$

where  $\kappa = \mu_4/V^2$  is the kurtosis. This completes the proof.

1. Oehlert GW (1992) A note on the delta method. *Am Stat* 46(1):27–29.
2. Hosmer DW, Lemeshow S, May S (2008) *Applied Survival Analysis: Regression Modeling of Time-to-Event Data* (Wiley, New York), 2nd Ed.
3. Zhang L (2007) Sample mean and sample variance: their covariance and their (in)dependence. *Am Stat* 61(2):159–160.
4. Pearson K (1903) On the probable errors of frequency constants. *Biometrika* 2(3):273–281.
5. Pearson K (1913) On the probable errors of frequency constants part II. *Biometrika* 9(1/2):1–10.
6. Neyman J (1925) Contributions to the theory of small samples drawn from a finite population. *Biometrika* 17(3/4):472–479.
7. Neyman J (1926) On the correlation of the mean and the variance in samples drawn from an “infinite” population. *Biometrika* 18(3/4):401–413.
8. Snedecor GW, Cochran WG (1980) *Statistical Methods* (Iowa State Univ Press, Ames, IA), 7th Ed.

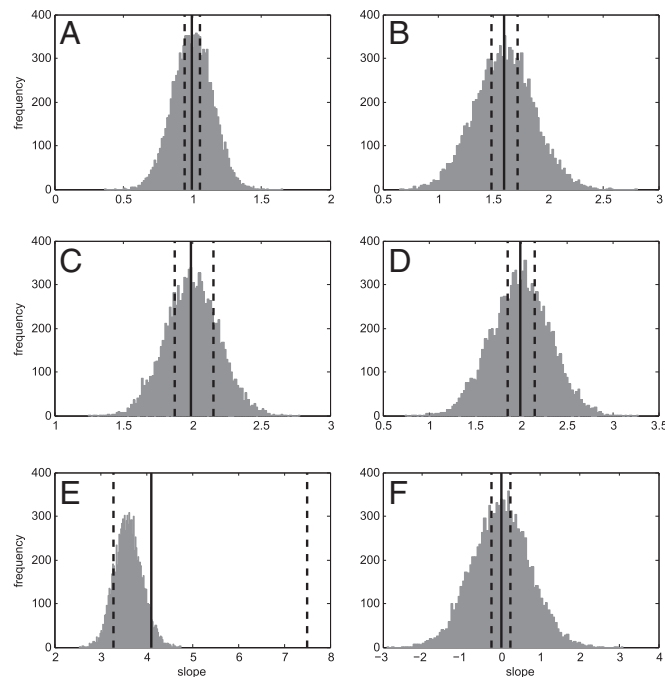

**Fig. S1.** Comparison of TL slope estimator  $\hat{b}$  predicted from theory and computed using linear regression for (A) Poisson ( $\lambda = 1$ ), (B) negative binomial ( $r = 5, p = 0.4$ ), (C) exponential ( $\lambda = 1$ ), (D) gamma ( $\alpha = 4, \beta = 1$ ), (E) lognormal ( $\mu = 1, \sigma = 1$ ), and (F) shifted normal [ $5 + \mathcal{N}(0, 1)$ ] distributions. Gray histogram shows the distribution of point estimates of  $b$  from 10,000 linear regressions. For each distribution, the black solid line and dashed lines give, respectively, the median and 95% CI of  $b$  calculated from 10,000 random copies of  $n \times N$  iid samples using the theoretical formula (Eq. 3).
